# Supplementary material for: Fabrication of lipophilic gold nanoparticles for studying lipids by surface enhanced Raman spectroscopy (SERS)
Source: Royal Society of Chemistry journal article supplement (doi:10.1039/c4an00502c), 2014-01-01
Supplement: c4an00502c1.pdf [file c4an00502c1.pdf]

## Supporting Information

### Fabrication of Lipophilic Gold Nanoparticles for Studying Lipids by Surface Enhanced Raman Spectroscopy (SERS)

*Michael Driver,<sup>†</sup> Yue Li,<sup>†,‡</sup> Jinkai Zheng,<sup>†,§</sup> Eric Decker,<sup>†</sup> David Julian McClements<sup>†</sup> and Lili He<sup>\*,†</sup>*

#### Particle size distribution and morphology of the AuNPs in citrate

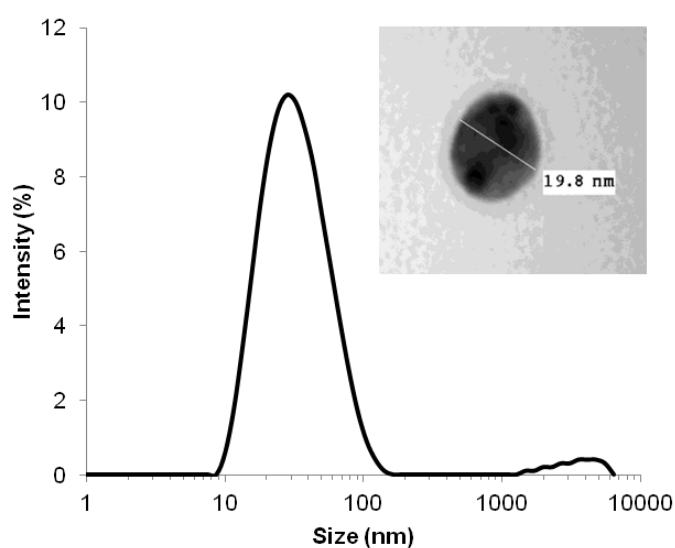

Figure S1. Particle size distribution of prepared AuNPs in citrate and a representative Transmission Electron Microscopic image of an AuNP.

The oxidation of the canola oil was validated by measuring the hydroperoxide value using the method described previously<sup>1</sup>.

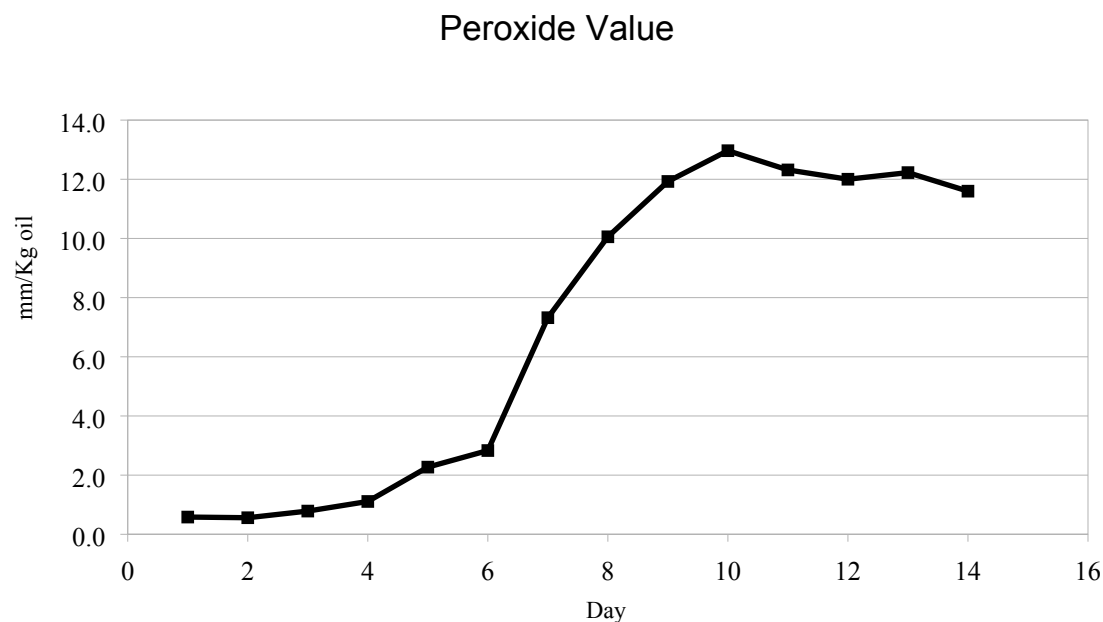

Figure S2. Formation of lipid hydroperoxides during the oxidation. At day 7, the hydroperoxide value was significantly increased.

#### References

- (1) Hu, M.; McClements, D. J.; Decker, E. a Lipid Oxidation in Corn Oil-in-water Emulsions Stabilized by Casein, Whey Protein Isolate, and Soy Protein Isolate. *Journal of agricultural and food chemistry* **2003**, *51*, 1696–700.
